# Supplementary material for: Dishevelled Paralogs in Vertebrate Development: Redundant or Distinct?
Source: PubMed Central journal article supplement (PMC5445114; doi:10.3389/fcell.2017.00059), 2017-05-26
Supplement: Table1.pdf [file Table1.pdf]

**Supplementary Table 1:** Overview of DVL knock-out mouse phenotypes

| Genotype \ Phenotype                             | <i>DVL1</i> <sup>-/-</sup> | <i>DVL2</i> <sup>-/-</sup> | <i>DVL3</i> <sup>-/-</sup> | <i>DVL1</i> <sup>-/-</sup> ;<br><i>DVL2</i> <sup>-/-</sup> | <i>DVL2</i> <sup>+/-</sup> ;<br><i>DVL3</i> <sup>-/-</sup> | <i>DVL2</i> <sup>-/-</sup> ;<br><i>DVL3</i> <sup>+/-</sup> | <i>DVL2</i> <sup>-/-</sup> ;<br><i>DVL3</i> <sup>-/-</sup> | <i>DVL1</i> <sup>-/-</sup> ;<br><i>DVL3</i> <sup>-/-</sup> | <i>DVL1</i> <sup>-/-</sup> ;<br><i>DVL2</i> <sup>+/-</sup> ;<br><i>DVL3</i> <sup>-/-</sup> | <i>DVL1</i> <sup>-/-</sup> ;<br><i>DVL2</i> <sup>-/-</sup> ;<br><i>DVL3</i> <sup>+/-</sup> | <i>DVL1</i> <sup>-/-</sup> ;<br><i>DVL2</i> <sup>-/-</sup> ;<br><i>DVL3</i> <sup>-/-</sup> |
|--------------------------------------------------|----------------------------|----------------------------|----------------------------|------------------------------------------------------------|------------------------------------------------------------|------------------------------------------------------------|------------------------------------------------------------|------------------------------------------------------------|--------------------------------------------------------------------------------------------|--------------------------------------------------------------------------------------------|--------------------------------------------------------------------------------------------|
| abnormal social behavior                         | +                          |                            |                            |                                                            |                                                            |                                                            |                                                            |                                                            |                                                                                            |                                                                                            |                                                                                            |
| sensorimotor gating defects                      | +                          |                            |                            |                                                            |                                                            |                                                            |                                                            |                                                            |                                                                                            |                                                                                            |                                                                                            |
| neuronal differentiation and function            | +                          |                            |                            |                                                            |                                                            |                                                            |                                                            |                                                            |                                                                                            |                                                                                            |                                                                                            |
| congenital heart defects                         |                            | +                          | +                          | +                                                          | +                                                          | +                                                          |                                                            |                                                            |                                                                                            |                                                                                            |                                                                                            |
| skeletal defects posterior                       |                            |                            |                            |                                                            | +                                                          | +                                                          |                                                            |                                                            |                                                                                            |                                                                                            |                                                                                            |
| skeletal defects vertebrae and ribs              |                            | +                          |                            | +                                                          |                                                            |                                                            |                                                            |                                                            |                                                                                            |                                                                                            |                                                                                            |
| neural tube defects                              |                            | + (2-3%)                   |                            | + (>90%)                                                   | +                                                          | +                                                          |                                                            |                                                            |                                                                                            |                                                                                            |                                                                                            |
| PCP defect in organ of Corti                     |                            |                            | +                          | +                                                          | +                                                          |                                                            |                                                            |                                                            |                                                                                            |                                                                                            |                                                                                            |
| Nodal cilia defects                              |                            |                            |                            |                                                            |                                                            |                                                            |                                                            |                                                            | +                                                                                          | +                                                                                          |                                                                                            |
| cilia defects in ependymal cells (hydrocephalus) |                            |                            |                            |                                                            |                                                            |                                                            |                                                            |                                                            |                                                                                            | +                                                                                          | (cond.)                                                                                    |
| gastrulation defects                             |                            |                            |                            |                                                            |                                                            |                                                            |                                                            |                                                            |                                                                                            |                                                                                            | +                                                                                          |
| anterior-posterior shortening                    |                            |                            |                            | +                                                          |                                                            |                                                            |                                                            |                                                            | +                                                                                          |                                                                                            |                                                                                            |
| embryonic lethal                                 |                            |                            |                            |                                                            |                                                            | +                                                          | (E9.5)                                                     | +                                                          | (E8.5)                                                                                     | +                                                                                          | (E13.5-15.5)                                                                               |

- Ahmad-Annur, A., Ciani, L., Simeonidis, I., Herreros, J., Fredj, N. B., Rosso, S. B., et al. (2006). Signaling across the synapse: a role for Wnt and Dishevelled in presynaptic assembly and neurotransmitter release. *J Cell Biol* 174, 127–139. doi:10.1083/jcb.200511054.
- Hamblet, N. S., Lijam, N., Ruiz-Lozano, P., Wang, J., Yang, Y., Luo, Z., et al. (2002). Dishevelled 2 is essential for cardiac outflow tract development, somite segmentation and neural tube closure. *Development* 129, 5827–5838. doi:10.1242/dev.00164
- Hashimoto, M., Shinohara, K., Wang, J., Ikeuchi, S., Yoshida, S., Meno, C., et al. (2010). Planar polarization of node cells determines the rotational axis of node cilia. *Nat Cell Biol* 12, 170–176. doi:10.1038/ncb2020.
- Lijam, N., Paylor, R., McDonald, M. P., Crawley, J. N., Deng, C. X., Herrup, K., et al. (1997). Social interaction and sensorimotor gating abnormalities in mice lacking Dvl1. *Cell* 90, 895–905. doi:10.1016/S0092-8674(00)80354-2
- Ohata, S., Nakatani, J., Herranz-Pérez, V., Cheng, J., Belinson, H., Inubushi, T., et al. (2014). Loss of Dishevelleds Disrupts Planar Polarity in Ependymal Motile Cilia and Results in Hydrocephalus. *Neuron* 83, 558–571. doi:10.1016/j.neuron.2014.06.022.
- Rosso, S. B., Sussman, D., Wynshaw-Boris, A., and Salinas, P. C. (2005). Wnt signaling through Dishevelled, Rac and JNK regulates dendritic development. *Nat Neurosci* 8, 34–42. doi:10.1038/nn1374.
- Sinha, T., Wang, B., Evans, S., Wynshaw-Boris, A., and Wang, J. (2012). Dishevelled mediated planar cell polarity signaling is required in the second heart field lineage for outflow tract morphogenesis. *Dev Biol* 370, 135–144. doi:10.1016/j.ydbio.2012.07.023.
- Wang, J., Hamblet, N. S., Mark, S., Dickinson, M. E., Brinkman, B. C., Segil, N., et al. (2006). Dishevelled genes mediate a conserved mammalian PCP pathway to regulate convergent extension during neurulation. *Development* 133, 1767–1778. doi:10.1242/dev.02347.
- Wang, J., Mark, S., Zhang, X., Qian, D., Yoo, S.-J., Radde-Gallwitz, K., et al. (2005). Regulation of polarized extension and planar cell polarity in the cochlea by the vertebrate PCP pathway. *Nat Genet* 37, 980–985. doi:10.1038/ng1622.
